# Supplementary material for: MCL-1 as a molecular switch between myofibroblastic and pro-angiogenic features of breast cancer- associated fibroblasts
Source: Research Square preprint supplement (doi:10.21203/rs.3.rs-6007010/v1), 2025-02-24

**Figure 1A**

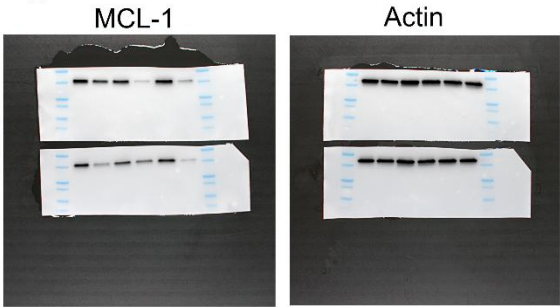

**Figure 2E and Supplementary figure 2F**

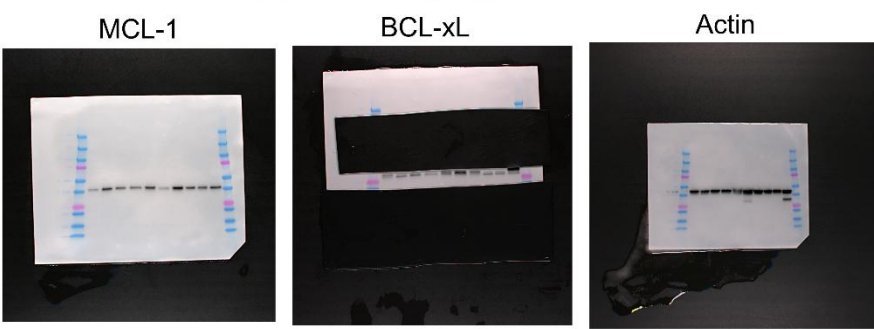

**Figure 4A**

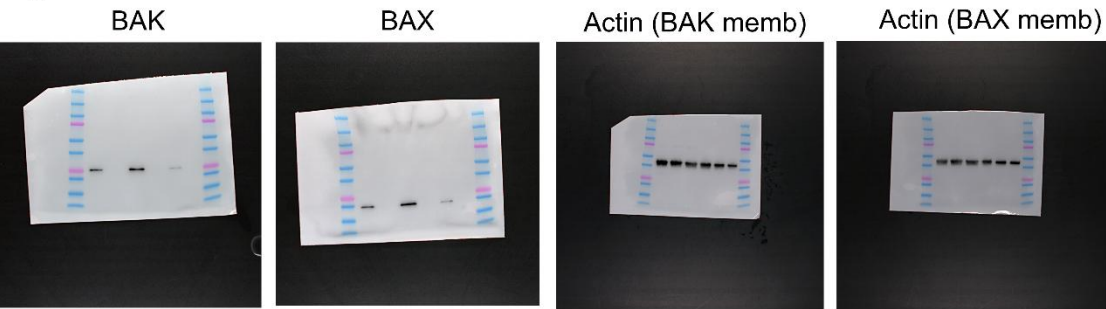

**Figure 6A**

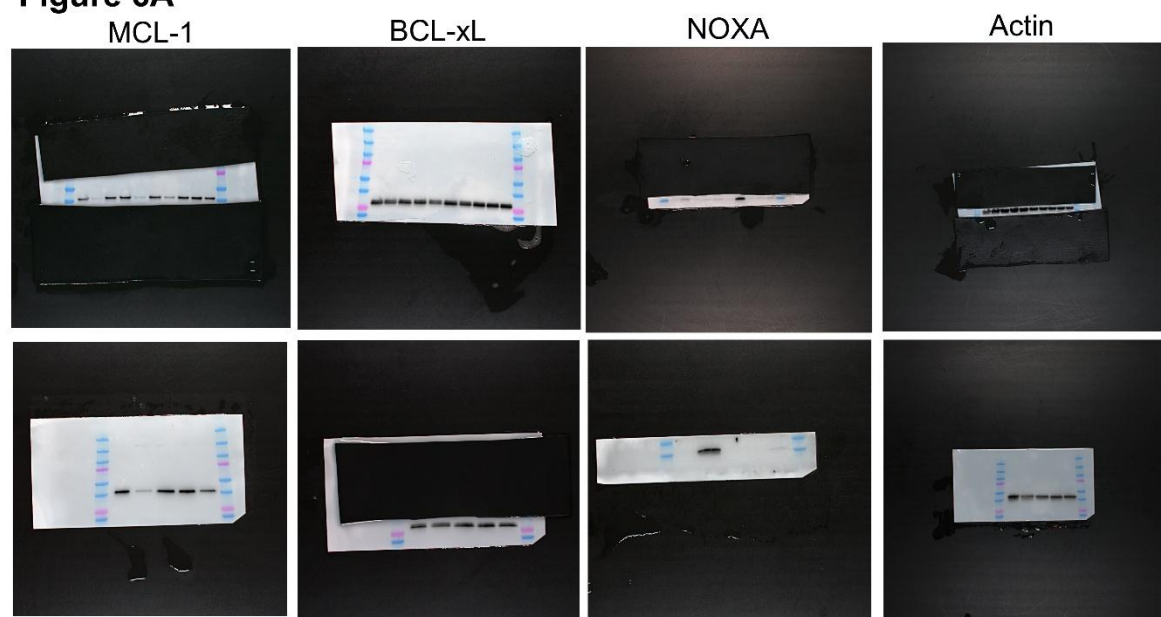

**Figure 6H**

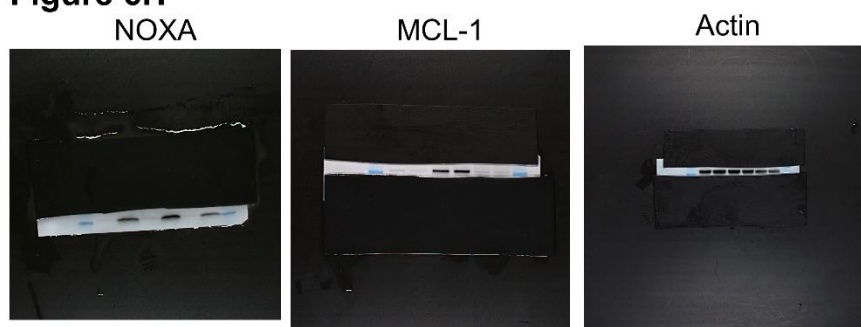

Supplementary figure 2A

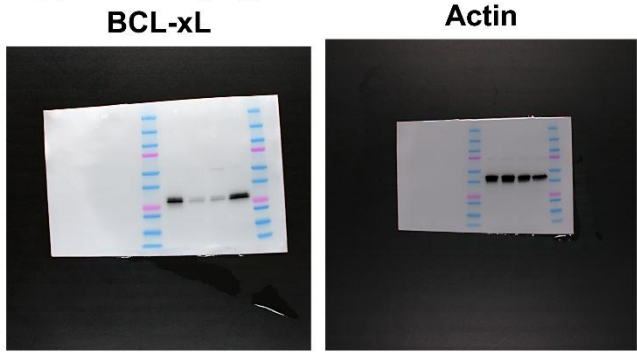

Supplementary figure 3A

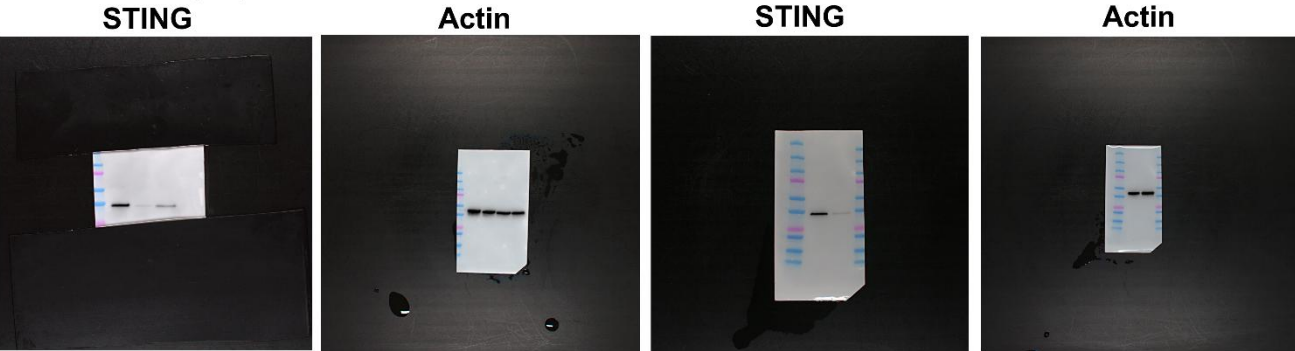

Supplementary figure 3C

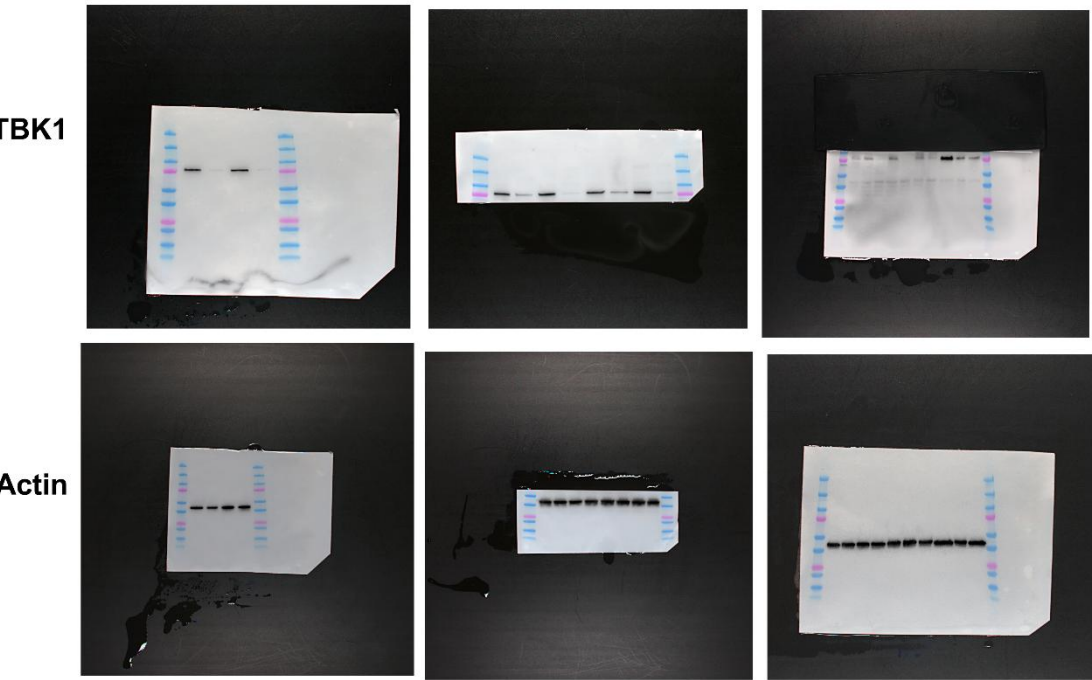

Supplementary figure 3E

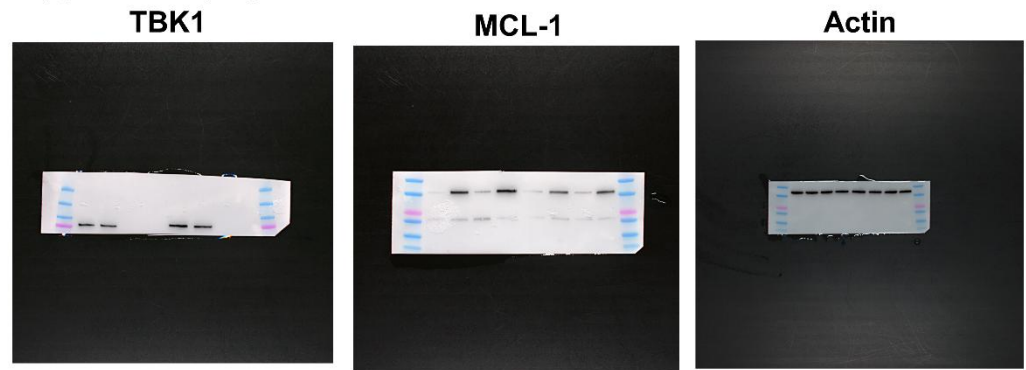

Supplementary figure 4B

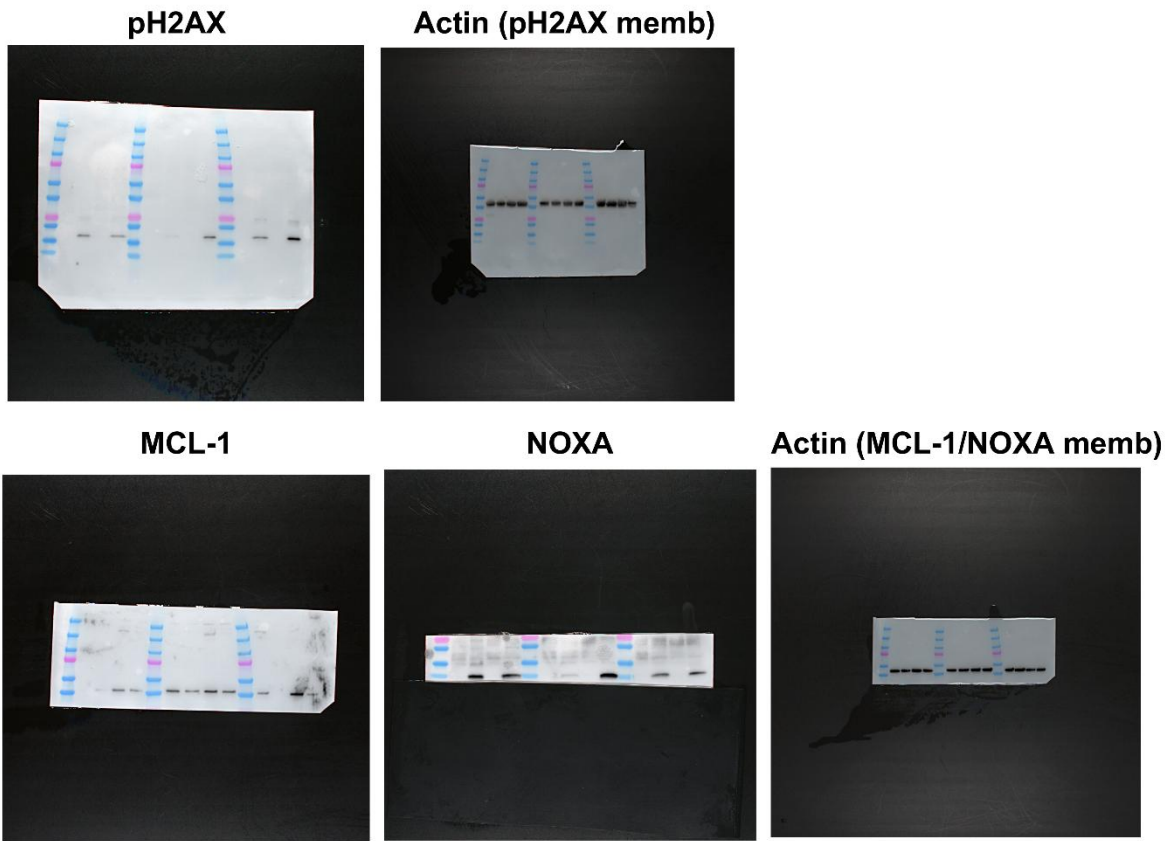

Supplementary figure 4C

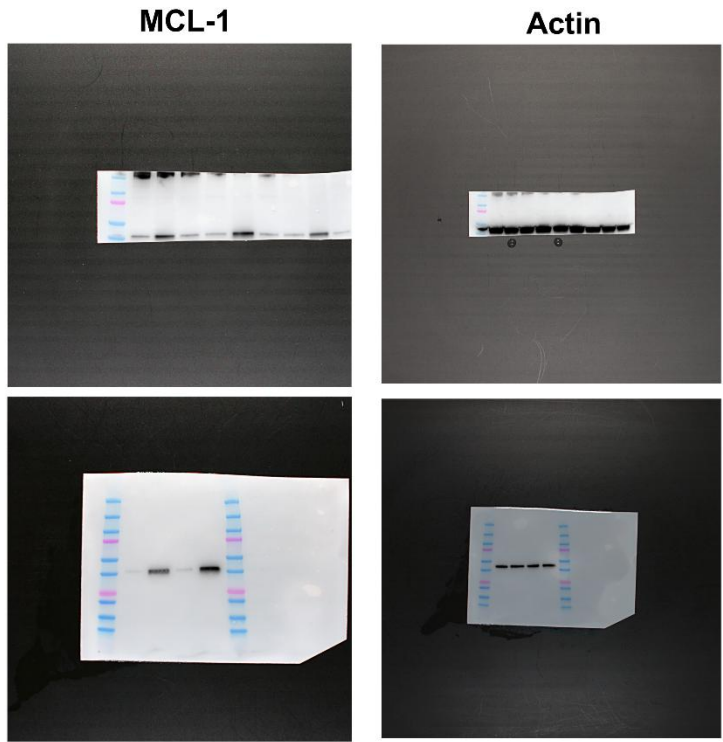

Supplement: Supplementary file 1 [file 7781cf6487e4de7ca1624c12.pdf]
